# Supplementary material for: Does Clear Aligner Treatment Result in Different Patient Perceptions of Treatment Process and Outcomes Compared to Conventional/Traditional Fixed Appliance Treatment: A Literature Review
Source: PubMed Central journal article supplement (PMC9339930; doi:10.1055/s-0041-1739441), 2021-12-22
Supplement: 10-1055-s-0041-1739441-s2161652.pdf [file 10-1055-s-0041-1739441-s2161652.pdf]

**Supplementary Table S1** Excluded articles

| Citation                                                                                                                                                                                                                                                                                |
|-----------------------------------------------------------------------------------------------------------------------------------------------------------------------------------------------------------------------------------------------------------------------------------------|
| Martorelli M, Gerbino S, Giudice M, Ausiello P. A comparison between customized clear and removable orthodontic appliances manufactured using RP and CNC techniques. <i>Dent Mater J</i> 2013;29(2):e1–e10                                                                              |
| Hennessy J, Garvey T, Al-Awadhi EA. A randomized clinical trial comparing mandibular incisor proclination produced by fixed labial appliances and clear aligners. <i>Angle Orthod</i> 2016;86(5):706–712                                                                                |
| Wiedel AP, Bondemark L. A randomized controlled trial of self-perceived pain, discomfort, and impairment of jaw function in children undergoing orthodontic treatment with fixed or removable appliances. <i>Angle Orthod</i> 2016;86(2):324–330                                        |
| Charalampakis O, Iliadi A, Ueno H, Oliver DR, Kim, KB. Accuracy of clear aligners: a retrospective study of patients who needed refinement. <i>Am J Orthod Dentofac Orthop</i> 2018;154(1):47–54                                                                                        |
| Sollenius O, Petrén S, Bondemark L. An RCT on clinical effectiveness and cost analysis of correction of unilateral posterior crossbite with functional shift in specialist and general dentistry. <i>Eur J Orthod</i> 2020;42(1):44–51                                                  |
| Forde K, Storey M, Littlewood SJ, Scott P, Luther F, Kang J. Bonded versus vacuum-formed retainers: a randomized controlled trial. Part 1: stability, retainer survival, and patient satisfaction outcomes after 12 months. <i>Eur J Orthod</i> 2018;40(4):387–398                      |
| Dai FF, Xu TM, Shu G. Comparison of achieved and predicted tooth movement of maxillary first molars and central incisors: first premolar extraction treatment with Invisalign. <i>Angle Orthod</i> 2019;89(5):679–687                                                                   |
| Sharma K, Mangat S, Kichorchandra MS, Handa A, Bindhumadhav S, Meena M. Correlation of orthodontic treatment by fixed or myofunctional appliances and periodontitis: a retrospective study. <i>J Contemp Dent Pract</i> 2017;18(4):322–325                                              |
| Park, J. H., & Kim, T. W. Deep-bite correction using a clear aligner and intramaxillary elastics. <i>J Clin Orthod</i> 2009;43(3):152–157                                                                                                                                               |
| Grünheid T, Gaalaas S, Hamdan H, Larson BE. Effect of clear aligner therapy on the buccolingual inclination of mandibular canines and the intercanine distance. <i>Angle Orthod</i> 2016;86(1):10–16                                                                                    |
| Al-Moghrabi D, Johal A, O'Rourke N, Donos N, Pandis N, Gonzales-Marin C, Fleming PS. Effects of fixed vs removable orthodontic retainers on stability and periodontal health: 4-year follow-up of a randomized controlled trial. <i>Am J Orthod Dentofac Orthop</i> 2018;154(2):167–174 |
| Dasy H, Dasy A, Asatrian G, Rózsa N, Lee HF, Kwak JH (2015). Effects of variable attachment shapes and aligner material on aligner retention. <i>Angle Orthod</i> 2015;85(6):934–940                                                                                                    |
| Gu J, Tang JS, Skulski B, Fields Jr HW, Beck FM, Firestone AR, Deguchi T. Evaluation of Invisalign treatment effectiveness and efficiency compared with conventional fixed appliances using the Peer Assessment Rating index. <i>Am J Orthod Dentofac Orthop</i> 2017;151(2):259–266    |
| Eissa O, Carlyle T, El-Bialy T. Evaluation of root length following treatment with clear aligners and two different fixed orthodontic appliances. A pilot study. <i>J Orthod Sci</i> 2018;7:11                                                                                          |
| Wiedel AP, Bondemark L. Fixed versus removable orthodontic appliances to correct anterior crossbite in the mixed dentition—a randomized controlled trial. <i>Eur J Orthod</i> 2015;37(2):123–127                                                                                        |
| Kravitz ND, Kusnoto B, BeGole E, Obrez A, Agran B. (2009). How well does Invisalign work? A prospective clinical study evaluating the efficacy of tooth movement with Invisalign. <i>Am J Orthod Dentofac Orthop</i> 2009;135(1):27–35                                                  |
| Caruso S, Nota A, Ehsani S, Maddalone E, Ojima K, Tecco S. Impact of molar teeth distalization with clear aligners on occlusal vertical dimension: a retrospective study. <i>BMC Oral Health</i> 2019;19(1):1–5                                                                         |
| Paes da Silva S, Pitchika V, Baumert U, Wehrbein H, Schwestka-Polly R, Drescher D, Wichelhaus A. Oral health-related quality of life in orthodontics: a cross-sectional multicentre study on patients in orthodontic treatment. <i>Eur J Orthod</i> 2020;42(3):270–280                  |
| Djeu G, Shelton C, Maganzini A. Outcome assessment of Invisalign and traditional orthodontic treatment compared with the American Board of Orthodontics objective grading system. <i>Am J Orthod Dentofac Orthop</i> 2005;128(3):292–298                                                |
| Papakostopoulou M, Migliorati M, Calzolari C, Gallo F, Drago S. Patients' expectations assessment in orthodontic treatment: findings from a questionnaire survey. <i>Minerva Stomatol</i> 2016;65(6):343–352                                                                            |
| Jäderberg S, Feldmann I, Engström C. Removable thermoplastic appliances as orthodontic retainers—a prospective study of different wear regimens. <i>Eur J Orthod</i> 2012;34(4):475–479                                                                                                 |
| Lanteri V, Farronato G, Lanteri C, Caravita R, Cossellu G. The efficacy of orthodontic treatments for anterior crowding with Invisalign compared with fixed appliances using the Peer Assessment Rating Index. <i>Quintessence Int</i> 2018;49(7):581–587                               |
| Carter LA, Geldenhuys M, Moynihan PJ, Slater DR, Exley CE, Rolland SL. The impact of orthodontic appliances on eating—young people's views and experiences. <i>J Orthod</i> 2015;42(2):114–122                                                                                          |
| Miethke RR, Wronski C. What can be achieved with removable orthodontic appliances? <i>J Orofac Orthop</i> 2009;70(3):185–199                                                                                                                                                            |
| Alajmi S, Shaban A, Al-Azemi R. Comparison of short-term oral impacts experienced by patients treated with Invisalign or conventional fixed orthodontic appliances. <i>Med Princ Pract</i> 2020;29(4):382–388                                                                           |

(Continued)

**Supplementary Table S1** (Continued)

| Citation                                                                                                                                                                                                             |
|----------------------------------------------------------------------------------------------------------------------------------------------------------------------------------------------------------------------|
| Livas C, Delli K, Pandis N. "My Invisalign experience": content, metrics and comment sentiment analysis of the most popular patient testimonials on YouTube. <i>Prog Orthod</i> 2018;19(1):1–8                       |
| Kankam H, Madari S, Sawh-Martinez R, Bruckman KC, Steinbacher DM. Comparing outcomes in orthognathic surgery using clear aligners versus conventional fixed appliances. <i>J Craniofac Surg</i> 2019;30(5):1488–1491 |
| Schaefer I, Braumann B. Halitosis, oral health and quality of life during treatment with Invisalign® and the effect of a low-dose chlorhexidine solution. <i>J Orofac Orthop</i> 2010; 71(6):430–441                 |
| Brignardello-Petersen R. Moderate-to-high levels of satisfaction and no important concerns in patients who received treatment with clear orthodontic aligners. <i>J Am Dent Assoc</i> 2019;150(2):e20                |
| Nedwed V, Miethke RR. (2005). Motivation, acceptance and problems of Invisalign® patients. <i>J Orofac Orthop</i> 2005;66(2):162–173                                                                                 |
| Walton DK, Fields HW, Johnston WM, Rosenstiel SF, Firestone AR, Christensen JC. Orthodontic appliance preferences of children and adolescents. <i>Am J Orthod Dentofac Orthop</i> 2010;138(6):698-e1.                |
| Pacheco-Pereira C, Brandelli J, Flores-Mir C. Patient satisfaction and quality of life changes after Invisalign treatment. <i>Am J Orthod Dentofac Orthop</i> 2018;153(6):834–841                                    |
| Pogal-Sussman-Gandia CB, Tabbaa S, Al-Jewair T. Effects of Invisalign® treatment on speech articulation. <i>Int Orthod</i> 2019;17(3):513–518                                                                        |

**Supplementary Table S2** Additional characteristics of included studies

| Author(s)                   | Inclusion criteria                                                                                                                                                                                                                                                                                                              | Exclusion criteria                                                                                                                                                                                                                                | Year       |
|-----------------------------|---------------------------------------------------------------------------------------------------------------------------------------------------------------------------------------------------------------------------------------------------------------------------------------------------------------------------------|---------------------------------------------------------------------------------------------------------------------------------------------------------------------------------------------------------------------------------------------------|------------|
| Alajmi et al, 2020          | Treatment involved both jaws<br>Treatment did not involve tooth extraction<br>Crowding or spacing limited to 1–4 mm<br>Angle class I molar relationship without skeletal discrepancy<br>Absence of vertical or transverse discrepancy<br>Absence of periodontal disease<br>Full complement of dentition except for third molars | Not stated                                                                                                                                                                                                                                        | Not stated |
| Miller et al, 2007          | At least 18 years of age<br>In good general health<br>Received treatment in both dental arches                                                                                                                                                                                                                                  | Not stated                                                                                                                                                                                                                                        | Not stated |
| Azaripour et al, 2015       | FOA or Invisalign for at least 6 months<br>Modified sulcus bleeding index (SBI) ≤20% prior to orthodontic treatment<br>Approximal plaque index (API) ≤25% prior to orthodontic treatment<br>Declaration of consent                                                                                                              | History of periodontitis<br>Diseases that affect periodontal health<br>Smoking<br>Pregnancy<br>Withdrawal of consent<br>Participation in another clinical trial                                                                                   | Not stated |
| Gao et al, 2021             | Ages greater than 18 years old<br>Good general health<br>Receiving orthodontic treatment in both arches                                                                                                                                                                                                                         | Untreated dental caries<br>Periodontal diseases<br>Missing teeth in need of prosthetic rehabilitation<br>Previous orthodontic treatment<br>Receiving lingual orthodontic treatment                                                                | Not stated |
| Antonio-Zancajo et al, 2020 | Patients between 18 and 40 years of age<br>With permanent dentition<br>Without previous orthodontic treatment<br>No previous extractions except third molars<br>Dental bone discrepancy between –2 and –6 mm in both arches                                                                                                     | Patients with deciduous teeth or in the process of dental replacement<br>Patients in need of orthodontic surgical treatment or dental extractions due to treatment<br>Patients with systemic diseases<br>Patients with medication that influences | Not stated |

Supplementary Table S2 (Continued)

| Author(s)              | Inclusion criteria                                                                                                                                                                                                                                                                                                                                                                                                                                                   | Exclusion criteria                                                                                                                                                                                                                                                                                                                                                           | Year       |
|------------------------|----------------------------------------------------------------------------------------------------------------------------------------------------------------------------------------------------------------------------------------------------------------------------------------------------------------------------------------------------------------------------------------------------------------------------------------------------------------------|------------------------------------------------------------------------------------------------------------------------------------------------------------------------------------------------------------------------------------------------------------------------------------------------------------------------------------------------------------------------------|------------|
|                        | Good oral health without caries or periodontal disease<br>Skeletal class I or mild classes II and III (ANB 0°–5°)                                                                                                                                                                                                                                                                                                                                                    | pain perception (analgesics, antidepressants, and/or anticonvulsants)<br>Severe malformations<br>Anatomy of the lingual side that would prevent lingual brackets being cemented in the lingual orthodontic group.                                                                                                                                                            |            |
| Flores-Mir et al, 2018 | All adult patients whose last orthodontic appointment before completion of treatment occurred between November 2014 and October 2016 were consecutively invited to participate in the survey during their debonding appointment                                                                                                                                                                                                                                      |                                                                                                                                                                                                                                                                                                                                                                              | 2014–2016  |
| Christou et al, 2020   | Males and females<br>Aged 12–30 years<br>Class I molar classification<br>Nonextraction treatment<br>Minor crowding (1–4 mm) in each dental arch<br>Treated in both dental arches<br>Pretreatment and posttreatment records available, including intraoral and extraoral composite photographs and lateral cephalometric radiographs taken within 6 months of initiation and completion of the treatment                                                              | Craniofacial discrepancies or syndromes<br>Previous orthognathic or cosmetic treatment<br>Previous esthetic treatment of lips<br>Previous traumas involving oral soft tissue<br>Patients with incomplete or poor quality of records<br>Unnatural posed smiles (i.e., a smile that is not reproducible, and therefore cannot be used as a reference for further measurements) | 2015–2018  |
| White, 2015            | Class I molar and canine relationships<br>Nonextraction treatments<br>Mandibular crowding of 4 mm or less<br>No missing teeth (from second to second molar)                                                                                                                                                                                                                                                                                                          | Anterior or posterior cross-bites<br>Anterior or lateral open bites<br>Maxillary overjet exceeding 3 mm<br>Impacted teeth                                                                                                                                                                                                                                                    | Not stated |
| Carrol, 2007           | Upper and lower dental arches must be treated<br>The fixed appliances group must be treated with wires and brackets only (no quad helix, rapid palatal expander, etc.)<br>Must be 12 to 15 months into treatment<br>Must be 18 years of age or older<br>Must be willing to sign and give written informed consent in accordance with institutional and federal guidelines<br>Must be in good general health<br>Premolar and incisor extraction cases were acceptable | Not stated                                                                                                                                                                                                                                                                                                                                                                   | Not stated |
| Nicholson, 2011        | Comprehensive orthodontic treatment<br>At least 18 years old when treatment commenced<br>Treatment completed within past 2 years                                                                                                                                                                                                                                                                                                                                     | Hybrid treatment involving both Invisalign and fixed appliances during most recent phase of orthodontics<br>Major health ailments that significantly affected activities of daily living (ADLs)                                                                                                                                                                              | Not stated |
| Rucker, 2012           | Not stated                                                                                                                                                                                                                                                                                                                                                                                                                                                           | Not stated                                                                                                                                                                                                                                                                                                                                                                   | Not stated |
| Lawton, 2003           | At least 18 years of age<br>Willing to sign informed consent<br>In good health<br>Able to be treated without extractions excluding a single lower incisor or third molars                                                                                                                                                                                                                                                                                            | Not stated                                                                                                                                                                                                                                                                                                                                                                   | Not stated |
| Shalish et al, 2012    | Age range 18–60 years<br>The need for comprehensive orthodontic treatment                                                                                                                                                                                                                                                                                                                                                                                            | Not stated                                                                                                                                                                                                                                                                                                                                                                   | Not stated |
